# Supplementary material
Source: PubMed Central journal article supplement (PMC7541589)
Supplement: NIHMS1582758-supplement-1.pdf [file NIHMS1582758-supplement-1.pdf]

**Supplemental Table 1: Logistic regression model to predict the odds of reoperation**

| <b>Independent Variables</b>         | <b>Unadjusted Odds Ratio<br/>(95% CI)</b> | <b>p-value</b> | <b>Adjusted Odds Ratio<br/>(95% CI)</b> | <b>p-value</b> |
|--------------------------------------|-------------------------------------------|----------------|-----------------------------------------|----------------|
| <b>Age at OR</b>                     | 0.88 (0.81 – 0.95)                        | 0.002          | 0.86 (0.77 – 0.95)                      | 0.003          |
| <b>Number of Initial Medications</b> | 1.09 (0.87 – 1.38)                        | 0.449          | 0.90 (0.68 – 1.19)                      | 0.450          |
| <b>Aortic reconstruction</b>         |                                           |                |                                         |                |
| <b>None</b>                          | Reference                                 |                | reference                               |                |
| <b>Patch</b>                         | 0.46 (0.15 – 1.43)                        | 0.178          | 0.11 (0.02 – 0.54)                      | 0.007          |
| <b>bypass</b>                        | 0.74 (0.27 – 2.00)                        | 0.550          | 0.27 (0.06 – 1.19)                      | 0.084          |
| <b>NF1</b>                           |                                           |                |                                         |                |
| <b>No</b>                            | Reference                                 |                | reference                               |                |
| <b>Yes</b>                           | 1.76 (0.73 – 4.27)                        | 0.210          | 1.26 (0.43 – 3.68)                      | 0.671          |
| <b>Abdominal Aortic Coarctation</b>  |                                           |                |                                         |                |
| <b>No</b>                            | Reference                                 |                | reference                               |                |
| <b>Yes</b>                           | 1.60 (0.76 – 3.39)                        | 0.216          | 6.01 (1.70 – 21.24)                     | 0.005          |
| <b>Had a prior intervention</b>      |                                           |                |                                         |                |
| <b>No</b>                            | Reference                                 |                | reference                               |                |
| <b>Yes</b>                           | 1.27 (0.58 – 2.80)                        | 0.553          | 1.61 (0.60 – 4.31)                      | 0.309          |

Supplemental Table 2: Ordinal Regression model to predict hypertension benefit

| Independent Variables                | Unadjusted Odds Ratio<br>(95% CI) | p-<br>value | Adjusted Odds Ratio<br>(95% CI) | p-<br>value |
|--------------------------------------|-----------------------------------|-------------|---------------------------------|-------------|
| <b>Age at OR</b>                     | 1.05 (1.00 – 1.11)                | 0.068       | 1.05 (0.98 – 1.12)              | 0.176       |
| <b>Number of Initial Medications</b> | 0.85 (0.71 – 1.02)                | 0.089       | 0.87 (0.71 – 1.06)              | 0.161       |
| <b>Aortic reconstruction</b>         |                                   |             |                                 |             |
| <b>None</b>                          | Reference                         |             | reference                       |             |
| <b>Patch</b>                         | 0.65 (0.30 – 1.38)                | 0.261       | 0.86 (0.28 – 2.62)              | 0.795       |
| <b>bypass</b>                        | 0.60 (0.28 – 1.30)                | 0.194       | 0.53 (0.18 – 1.62)              | 0.271       |
| <b>NF1</b>                           |                                   |             |                                 |             |
| <b>No</b>                            | Reference                         |             | reference                       |             |
| <b>Yes</b>                           | 0.42 (0.20 – 0.91)                | 0.028       | 0.48 (0.21 – 1.08)              | 0.075       |
| <b>Abdominal Aortic Coarctation</b>  |                                   |             |                                 |             |
| <b>No</b>                            | Reference                         |             | reference                       |             |
| <b>Yes</b>                           | 0.55 (0.31 – 1.00)                | 0.050       | 0.75 (0.28 – 1.97)              | 0.58        |
| <b>Had a prior intervention</b>      |                                   |             |                                 |             |
| <b>No</b>                            | Reference                         |             | reference                       |             |
| <b>Yes</b>                           | 0.62 (0.33 – 1.16)                | 0.143       | 0.49 (0.25 – 0.98)              | 0.042       |

2  
3  
4  
5  
6  
7  
8  
9  
10  
11  
12

# Journal of Vascular Surgery Publications

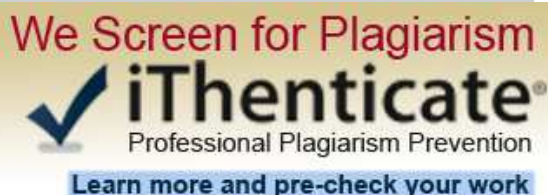

## Application for Publication

**Manuscript Title: SURGICAL MANAGEMENT OF PEDIATRIC RENIN-MEDIATED HYPERTENSION SECONDARY TO RENAL ARTERY OCCLUSIVE DISEASE AND ABDOMINAL AORTIC COARCTATION**

**AUTHORITY OF THE CORRESPONDING AUTHOR.** The authors designate **Click or tap here to enter text.** as the corresponding author and give this person the authority to submit this form, the manuscript text, figures, tables, and all other accompanying files to the Journal of Vascular Surgery Publications. The authors also authorize the corresponding author to communicate with the Editorial Office and the Publisher regarding the submission, peer-review, revision, and publication of this manuscript on behalf of the authors.

**CORRESPONDING AUTHOR RESPONSIBILITY.** The corresponding author confirms that they and the co-authors have read and agreed to follow the policies of the Journal of Vascular Surgery Publications. The corresponding author also confirms that they and the co-authors have approved the manuscript files, disclosed all relevant conflicts of interest, and verified their contributions and conflicts on this form prior to submission. The corresponding author is responsible for serving these same functions for the revision and resubmission of this work.

**NOTE:** Please include the names of the corresponding author and the **post-publication corresponding author** on the title page of the manuscript.

**Originality of Research.** Please select **one** option.

**COMPLETELY ORIGINAL.** The authors certify that this manuscript is original, has been written by the stated authors, has not been published previously, and is not under consideration for publication by another journal.

**FOLLOW UP.** This work is a follow up from a previously published study. It contains a patient cohort that has been reported previously.

**Please provide a link to the original publication, cite the original study in the manuscript, and list the increase in the number of patients and follow up time below.**

Link: \_\_\_\_\_

% Increase in Patient number: \_\_\_\_\_ % Increase in follow up time: \_\_\_\_\_ years

**OTHER.** Parts of the work or patient data included in this manuscript have been previously published. The authors have disclosed this information explicitly in the manuscript. In addition, the authors have received approval to submit previously published data from the Editor-in-Chief. **If you select this option, detailed description of the previously published information below:**

**Authorship Responsibility and Contributions to Authorship.** The authors must use the contributions table to indicate their involvement in the creation of this manuscript. It is important that a box is checked in each authorship category, otherwise the person will not qualify for authorship and the manuscript will be returned to the authors for correction.

**The boxes for “Approval” and Accountability”** must be checked for ALL authors. If an author declines to approve or be accountable for the work, they may not be included as authors.

**CRITERIA REQUIRED FOR AUTHORSHIP.** Authors must have contributed in all four categories.

|          |                               |                                                                                                                                                                                             |
|----------|-------------------------------|---------------------------------------------------------------------------------------------------------------------------------------------------------------------------------------------|
| <b>1</b> | <b>Research</b>               | including study design and conception; data collection; or data analysis and interpretation                                                                                                 |
| <b>2</b> | <b>Manuscript Development</b> | including writing the manuscript or providing critical revisions that are important for the intellectual content                                                                            |
| <b>3</b> | <b>Approval</b>               | of the final version of the manuscript files submitted to the Journal                                                                                                                       |
| <b>4</b> | <b>Accountability</b>         | Agreement to be accountable for all aspects of the work in ensuring that questions related to the accuracy or integrity of any part of the work are appropriately investigated and resolved |

**CONTRIBUTIONS TABLE.**

| List 2 initials for each author (example: AS, BP).<br>In the case of two authors with the same initials, please use their middle initial to differentiate between them (example: JEB, JTB). |    | Authors Must have contributed in All 4 Categories |          |                       |                                                     |                 |                           |                                 | Other (Optional)           |                             |                      |
|---------------------------------------------------------------------------------------------------------------------------------------------------------------------------------------------|----|---------------------------------------------------|----------|-----------------------|-----------------------------------------------------|-----------------|---------------------------|---------------------------------|----------------------------|-----------------------------|----------------------|
|                                                                                                                                                                                             |    | 1<br>Research<br>(Select one or more)             |          |                       | 2<br>Manuscript Development<br>(Select one or both) |                 | 3<br>Approval<br>(Select) | 4<br>Accountability<br>(Select) |                            |                             |                      |
|                                                                                                                                                                                             |    | Author Last Name                                  | Initials | Conception and Design | Analysis and Interpretation                         | Data Collection | Writing the Manuscript    | Critical Revision               | Approval of the Manuscript | Agreement to be Accountable | Statistical Analysis |
| Coleman                                                                                                                                                                                     | DM | X                                                 | X        | X                     | X                                                   | X               | X                         | X                               | X                          | X                           |                      |
| Eliason                                                                                                                                                                                     | JE | X                                                 | X        |                       |                                                     | X               | X                         | X                               | X                          |                             | X                    |
| Beaulieu                                                                                                                                                                                    | RB |                                                   |          | X                     |                                                     | X               | X                         | X                               | X                          |                             |                      |
| Jackson                                                                                                                                                                                     | TJ |                                                   |          | X                     |                                                     | X               | X                         | X                               | X                          |                             |                      |
| Karmakar                                                                                                                                                                                    | MK |                                                   | X        |                       |                                                     | X               | X                         | X                               | X                          | X                           |                      |
| Kershaw                                                                                                                                                                                     | DK | X                                                 |          |                       |                                                     | X               | X                         | X                               | X                          |                             |                      |
| Modi                                                                                                                                                                                        | ZM | X                                                 |          |                       |                                                     | X               | X                         | X                               | X                          |                             |                      |

|          |    |   |   |  |  |   |   |   |  |   |
|----------|----|---|---|--|--|---|---|---|--|---|
| Ganesh   | SG |   | X |  |  | X | X | X |  | X |
| Khaja    | MK | X |   |  |  | X | X | X |  |   |
| Williams | DW | X |   |  |  | X | X | X |  |   |
| Stanley  | JS | X | X |  |  | X | X | X |  | X |

You may add more rows if needed.

**Overall responsibility.** Dawn M. Coleman assumes overall responsibility and guarantees the scientific integrity of the work as a whole.

### Optional Authorship Designations:

**SHARED FIRST AUTHORSHIP:** Check this box if two authors participated equally and should share "first authorship". List these as first and second authors.

**SHARED SENIOR AUTHORSHIP:** If two authors participated equally and should share "senior authorship" enter their initials here: \_\_\_\_\_

### Conflict of Interest Disclosure

EACH author must disclose all relevant financial and nonfinancial potential conflicts of interest with respect to this manuscript. Potential conflicts of interest include, but are not limited to:

1. A financial contribution to the author or the authors' institution from a company or organization that might benefit (or lose) financially from the results, conclusions or discussion presented in the manuscript  
**Examples include:** Royalties, Patents (or patents pending), fees for consulting, fees for speaking when organized by a corporate sponsored speakers' bureau, funds for a member of the author's staff or family
2. Ownership of stocks, shares or options in a company or organization that might benefit (or lose) financially from the results, conclusion or discussion presented in the paper/letter
3. A commercial interest in the form of a relationship with an entity producing, marketing, re-selling, or distributing health care goods or services consumed by, or used on, patients
4. Other potential conflicts include:
  - a. an academic association or antagonism with someone whose interest might be affected by the paper
  - b. membership in a special interest group whose interests might be affected by the paper
  - c. other strong convictions that might have affected what was written

List conflicts of interest for EACH author below. If there are no conflicts of interest, please state "The authors have no competing interests" in the space below.

The authors have no competing interests

### ***Role of Sponsors***

Each author must disclose the name and involvement of all entities that provided financial support for this work. Please list the funding (grant, scholarships, donated devices, etc.) and describe the involvement of each sponsor in the:

1. Study design; collection, analysis, and interpretation of data;
2. Manuscript writing
3. The decision to submit the manuscript for publication
4. Any other involvement in the creation of the manuscript (Artwork, critical revision, etc.)

Funding: Supported in part from the Zangara Research Fund and Robson Research Fund, both established at the University of Michigan, R01HL139672 – no party had involvement in the study design or collection, analysis, and interpretation of data.

### ***Off Label Drugs and Devices***

The authors must make a meaningful disclosure regarding their discussions of off label or unapproved drugs or devices.

This study does include off label drugs and/or devices.

The specific names of the products discussed are: Click or tap here to enter text.

This study does not include off label drugs and/or devices.

The corresponding author confirms that they and the co-authors believe that this form and all accompanying files describe truthful facts. The corresponding author also certifies that they and each co-author have participated to a sufficient degree to take public responsibility for this manuscript, that their contributions and relevant conflicts of interest are accurately and completely reported on this form.

Signed: *Dawn M. Coleman, MD*

\*Date 10/9/2019

**\*(Please update for revised manuscripts and certify all statements in this manuscript are true.)**
